# Supplementary material for: Effect of Process Parameters on the Initial Burst Release of Protein-Loaded Alginate Nanospheres
Source: J Funct Biomater. 2019 Sep 16;10(3):42. doi: 10.3390/jfb10030042 (PMC6787618; doi:10.3390/jfb10030042)
Supplement: Supplementary file 1 [file jfb-10-00042-s001.pdf]

## Supplementary Materials

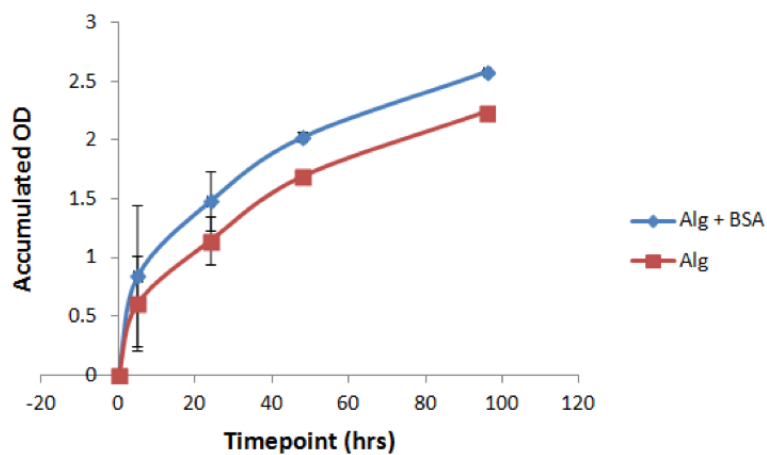

**Figure S1.** Alginate interference during the Bradford assay.

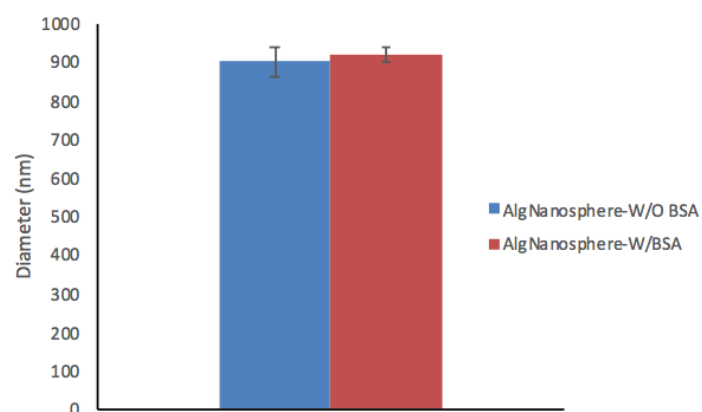

**Figure S2.** Effect of BSA on the size of alginate nanospheres.

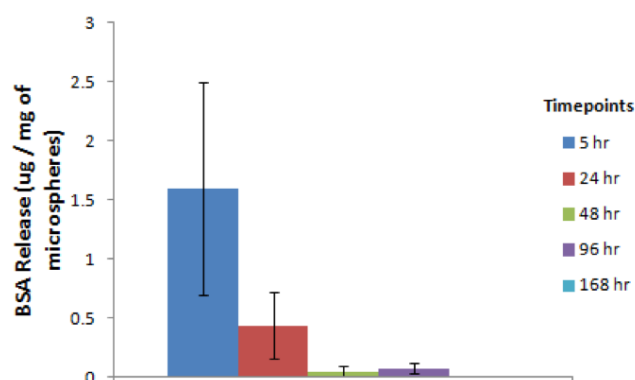

**Figure S3.** BSA release at different timepoints.

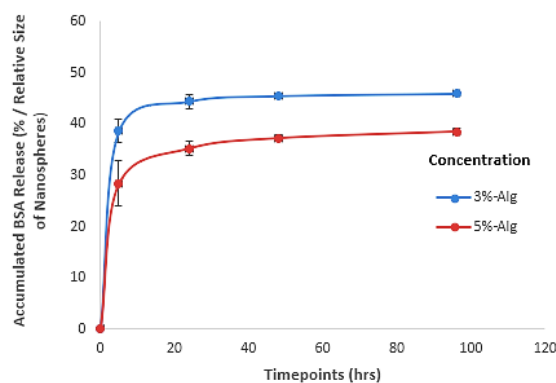

**Figure S4.** Effect of alginate concentration on protein release kinetics normalized based on the relative size of nanospheres.

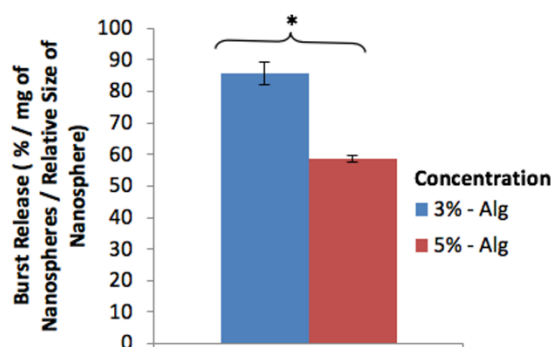

**Figure S5.** Effect of alginate concentration on the initial burst release normalized based on the relative size of nanospheres.

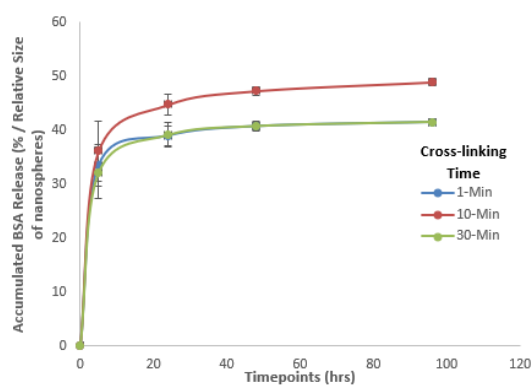

**Figure S6.** Effect of cross-linking time on protein release kinetics normalized based on the relative size of nanospheres.

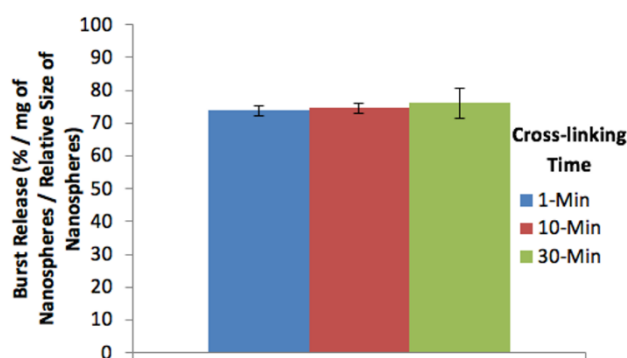

**Figure S7.** Effect of cross-linking time on the initial burst release normalized based on the relative size of nanospheres.

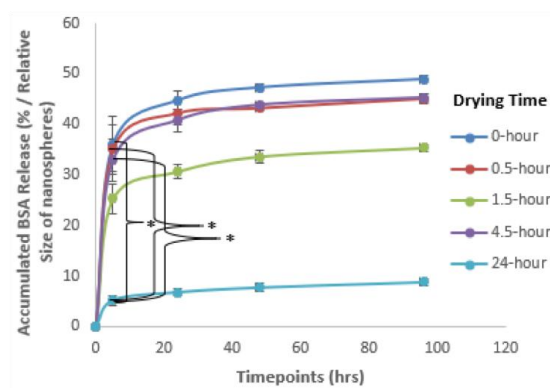

**Figure S8.** Effect of drying time on protein release kinetics normalized based on the relative size of nanospheres.

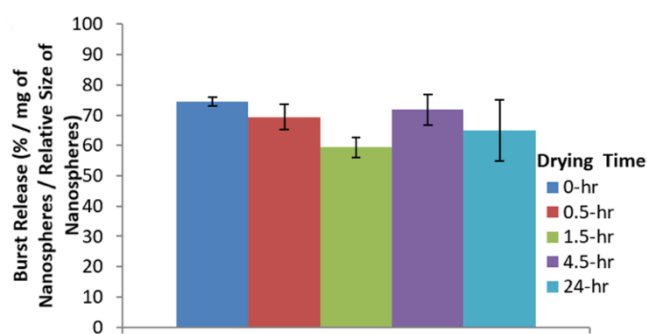

**Figure S9.** Effect of drying time on the initial burst release normalized based on the relative size of nanospheres.
